# Supplementary material for: Immune involvement of the contralateral hemisphere in a glioblastoma mouse model
Source: PubMed Central journal article supplement — J Immunother Cancer. 2020 Apr 16;8(1):e000323. doi: 10.1136/jitc-2019-000323 (PMC7204813; doi:10.1136/jitc-2019-000323), 2020-04-16
Supplement: jitc-2019-000323supp001.pdf [file jitc-2019-000323supp001.pdf]

## Supplementary information

*Supplementary Table 1: Lymphoid antibody staining panel*

| Antibody                      | Fluorochrome  | Clone    | Manufacturer           | Catalog no. |
|-------------------------------|---------------|----------|------------------------|-------------|
| PD-1 (CD279)                  | BV421         | 29F.1A12 | Biolegend              | 135218      |
| CD4                           | BV510         | GK1.5    | Biolegend              | 100449      |
| CD45                          | BV650         | 30-F11   | Biolegend              | 103151      |
| NK1.1                         | BV711         | PK136    | Biolegend              | 108745      |
| Lag-3 (CD223)                 | BV785         | C9B7W    | Biolegend              | 125219      |
| Tim-3 (CD366)                 | FITC          | REA602   | Miltenyi               | 130-109-449 |
| CD8a                          | PerCp         | 53-6.7   | Biolegend              | 100732      |
| OVA <sub>257-264</sub> -H-2Kb | PE            |          | Dr. Drijfhout,<br>LUMC |             |
| TIGIT                         | PE-Dazzle594  | 1G9      | Biolegend              | 142110      |
| HVEM (CD270)                  | PE-Vio770     | REA275   | Miltenyi               | 130-102-773 |
| GITR (CD357)                  | APC           | DTA-1    | Miltenyi               | 130-102-389 |
| CD3                           | AF700         | 17A2     | Biolegend              | 100216      |
| Fixable Viability Dye         | APC-eFluor780 |          | eBioscience            | 65-0865-14  |

**Supplementary Table 2: Myeloid antibody staining panel**

| <b>Antibody</b>       | <b>Fluorochrome</b> | <b>Clone</b> | <b>Manufacturer</b> | <b>Catalog no.</b> |
|-----------------------|---------------------|--------------|---------------------|--------------------|
| MHC-I                 | eFluor450           | AF6-88.5.5.3 | eBioscience         | 48-5958-82         |
| CD86                  | BV510               | GL-1         | Biolegend           | 105040             |
| Ly6C                  | BV605               | HK1.4        | Biolegend           | 128035             |
| CD11c                 | BV650               | N418         | Biolegend           | 117339             |
| CD45                  | BV785               | 30-F11       | Biolegend           | 103149             |
| CD11b                 | AF488               | M1/70        | Biolegend           | 101217             |
| CD155                 | PerCp-Cy5.5         | TX56         | Biolegend           | 131513             |
| Galectin-9            | PE                  | 108A2        | Biolegend           | 137903             |
| PD-L1 (CD274)         | PE-Dazzle594        | 10F.9G2      | Biolegend           | 124324             |
| BTLA (CD272)          | PE-Vio770           | REA224       | Miltenyi            | 130-102-687        |
| ILT3 (CD85k)          | AF647               | H1.1         | Biolegend           | 144906             |
| MHC-II (I-A/I-E)      | AF700               | M5/114.15.2  | Biolegend           | 107622             |
| Fixable Viability Dye | APC-eFluor780       |              | eBioscience         | 65-0865-14         |

**Supplementary Table 3: Lymphoid Foxp3 antibody staining panel**

| <b>Antibody</b>       | <b>Fluorochrome</b> | <b>Clone</b> | <b>Manufacturer</b> | <b>Catalog no.</b> |
|-----------------------|---------------------|--------------|---------------------|--------------------|
| PD-1 (CD279)          | BV421               | 29F.1A12     | Biolegend           | 135218             |
| CD4                   | BV510               | GK1.5        | Biolegend           | 100449             |
| CD45                  | BV650               | 30-F11       | Biolegend           | 103151             |
| TIGIT                 | PE-Dazzle594        | 1G9          | Biolegend           | 142110             |
| HVEM (CD270)          | PE-Vio770           | REA275       | Miltenyi            | 130-102-773        |
| Foxp3                 | PE-Cy5              | FJK-16s      | eBioscience         | 15-5773-82         |
| CD3                   | AF700               | 17A2         | Biolegend           | 100216             |
| Fixable Viability Dye | APC-eFluor780       |              | eBioscience         | 65-0865-14         |
