# Supplementary figures and images for: Immune involvement of the contralateral hemisphere in a glioblastoma mouse model
Source: PubMed Central journal article supplement — J Immunother Cancer. 2020 Apr 16;8(1):e000323. doi: 10.1136/jitc-2019-000323 (PMC7204813; doi:10.1136/jitc-2019-000323), 2020-04-16

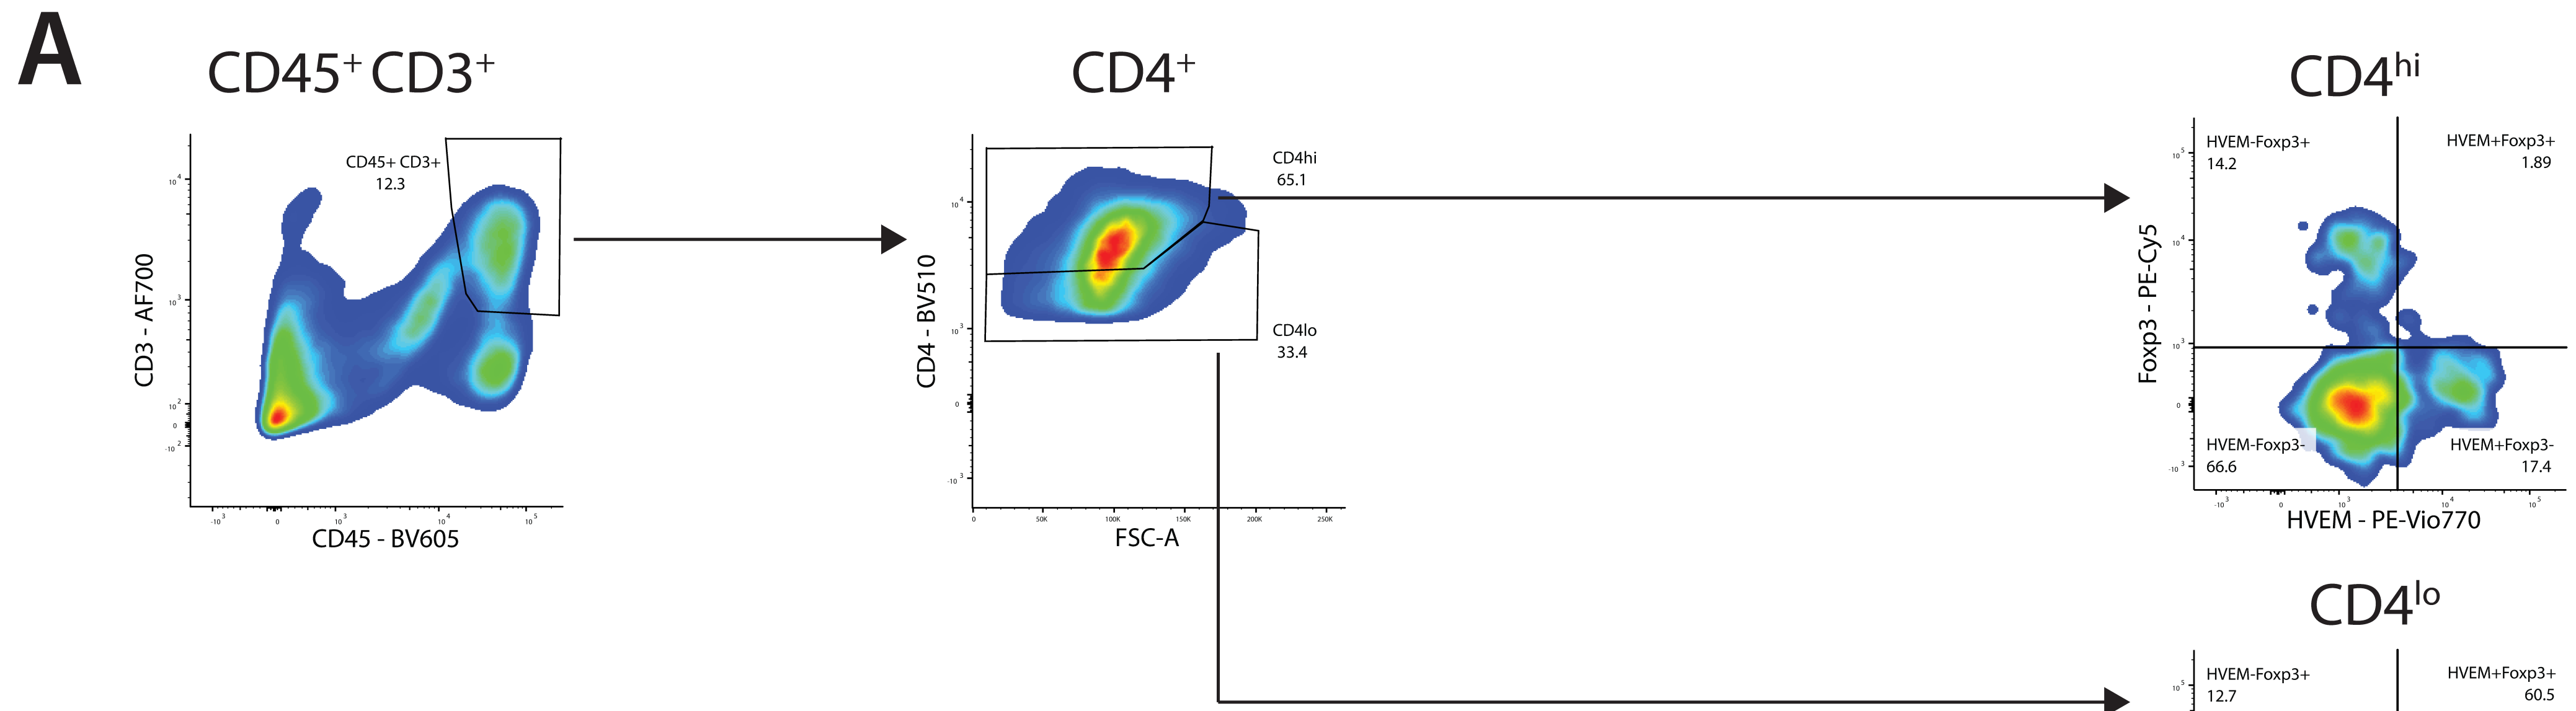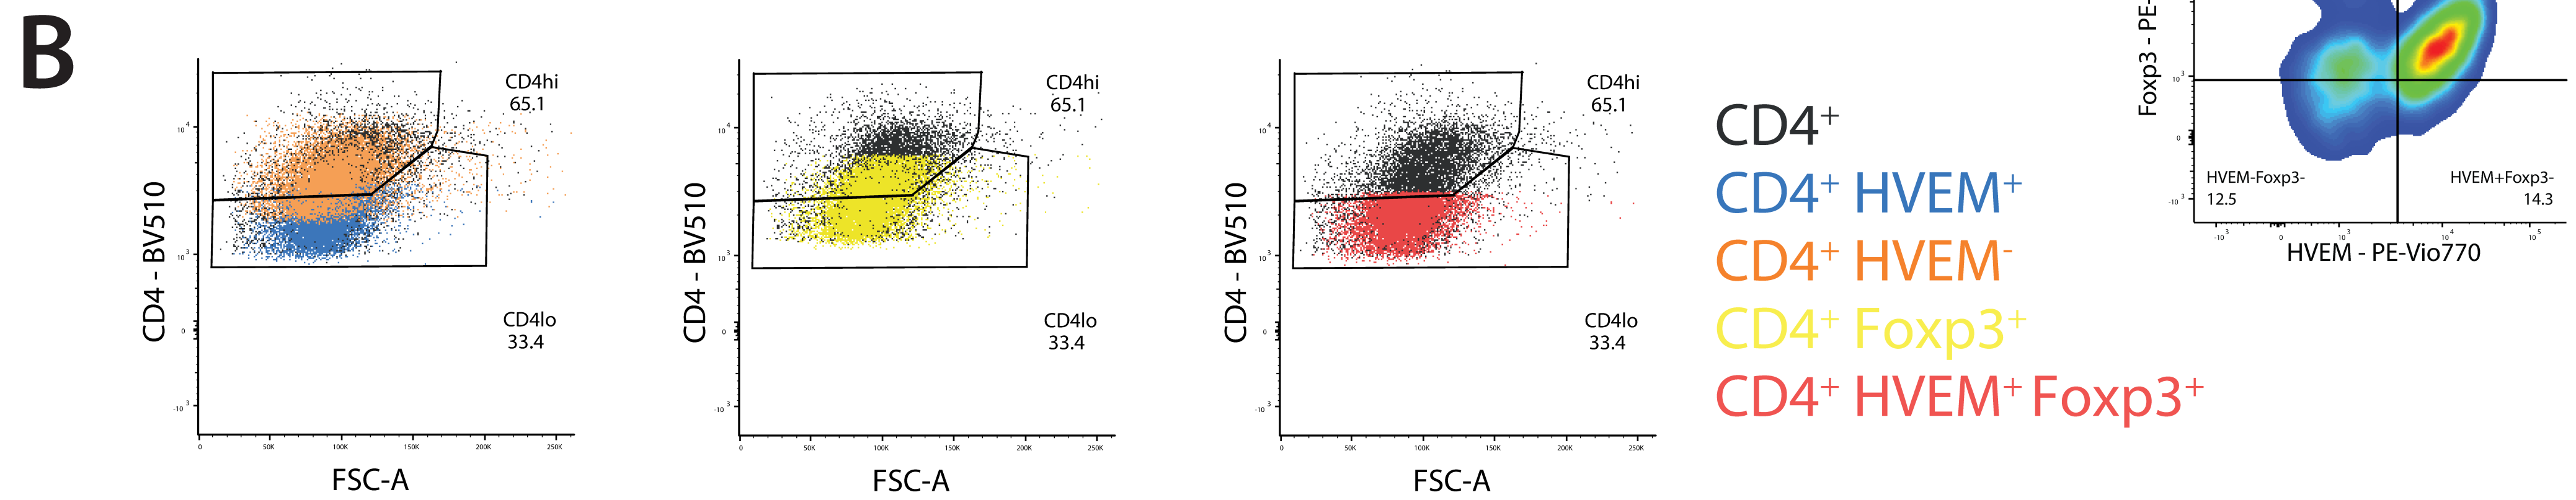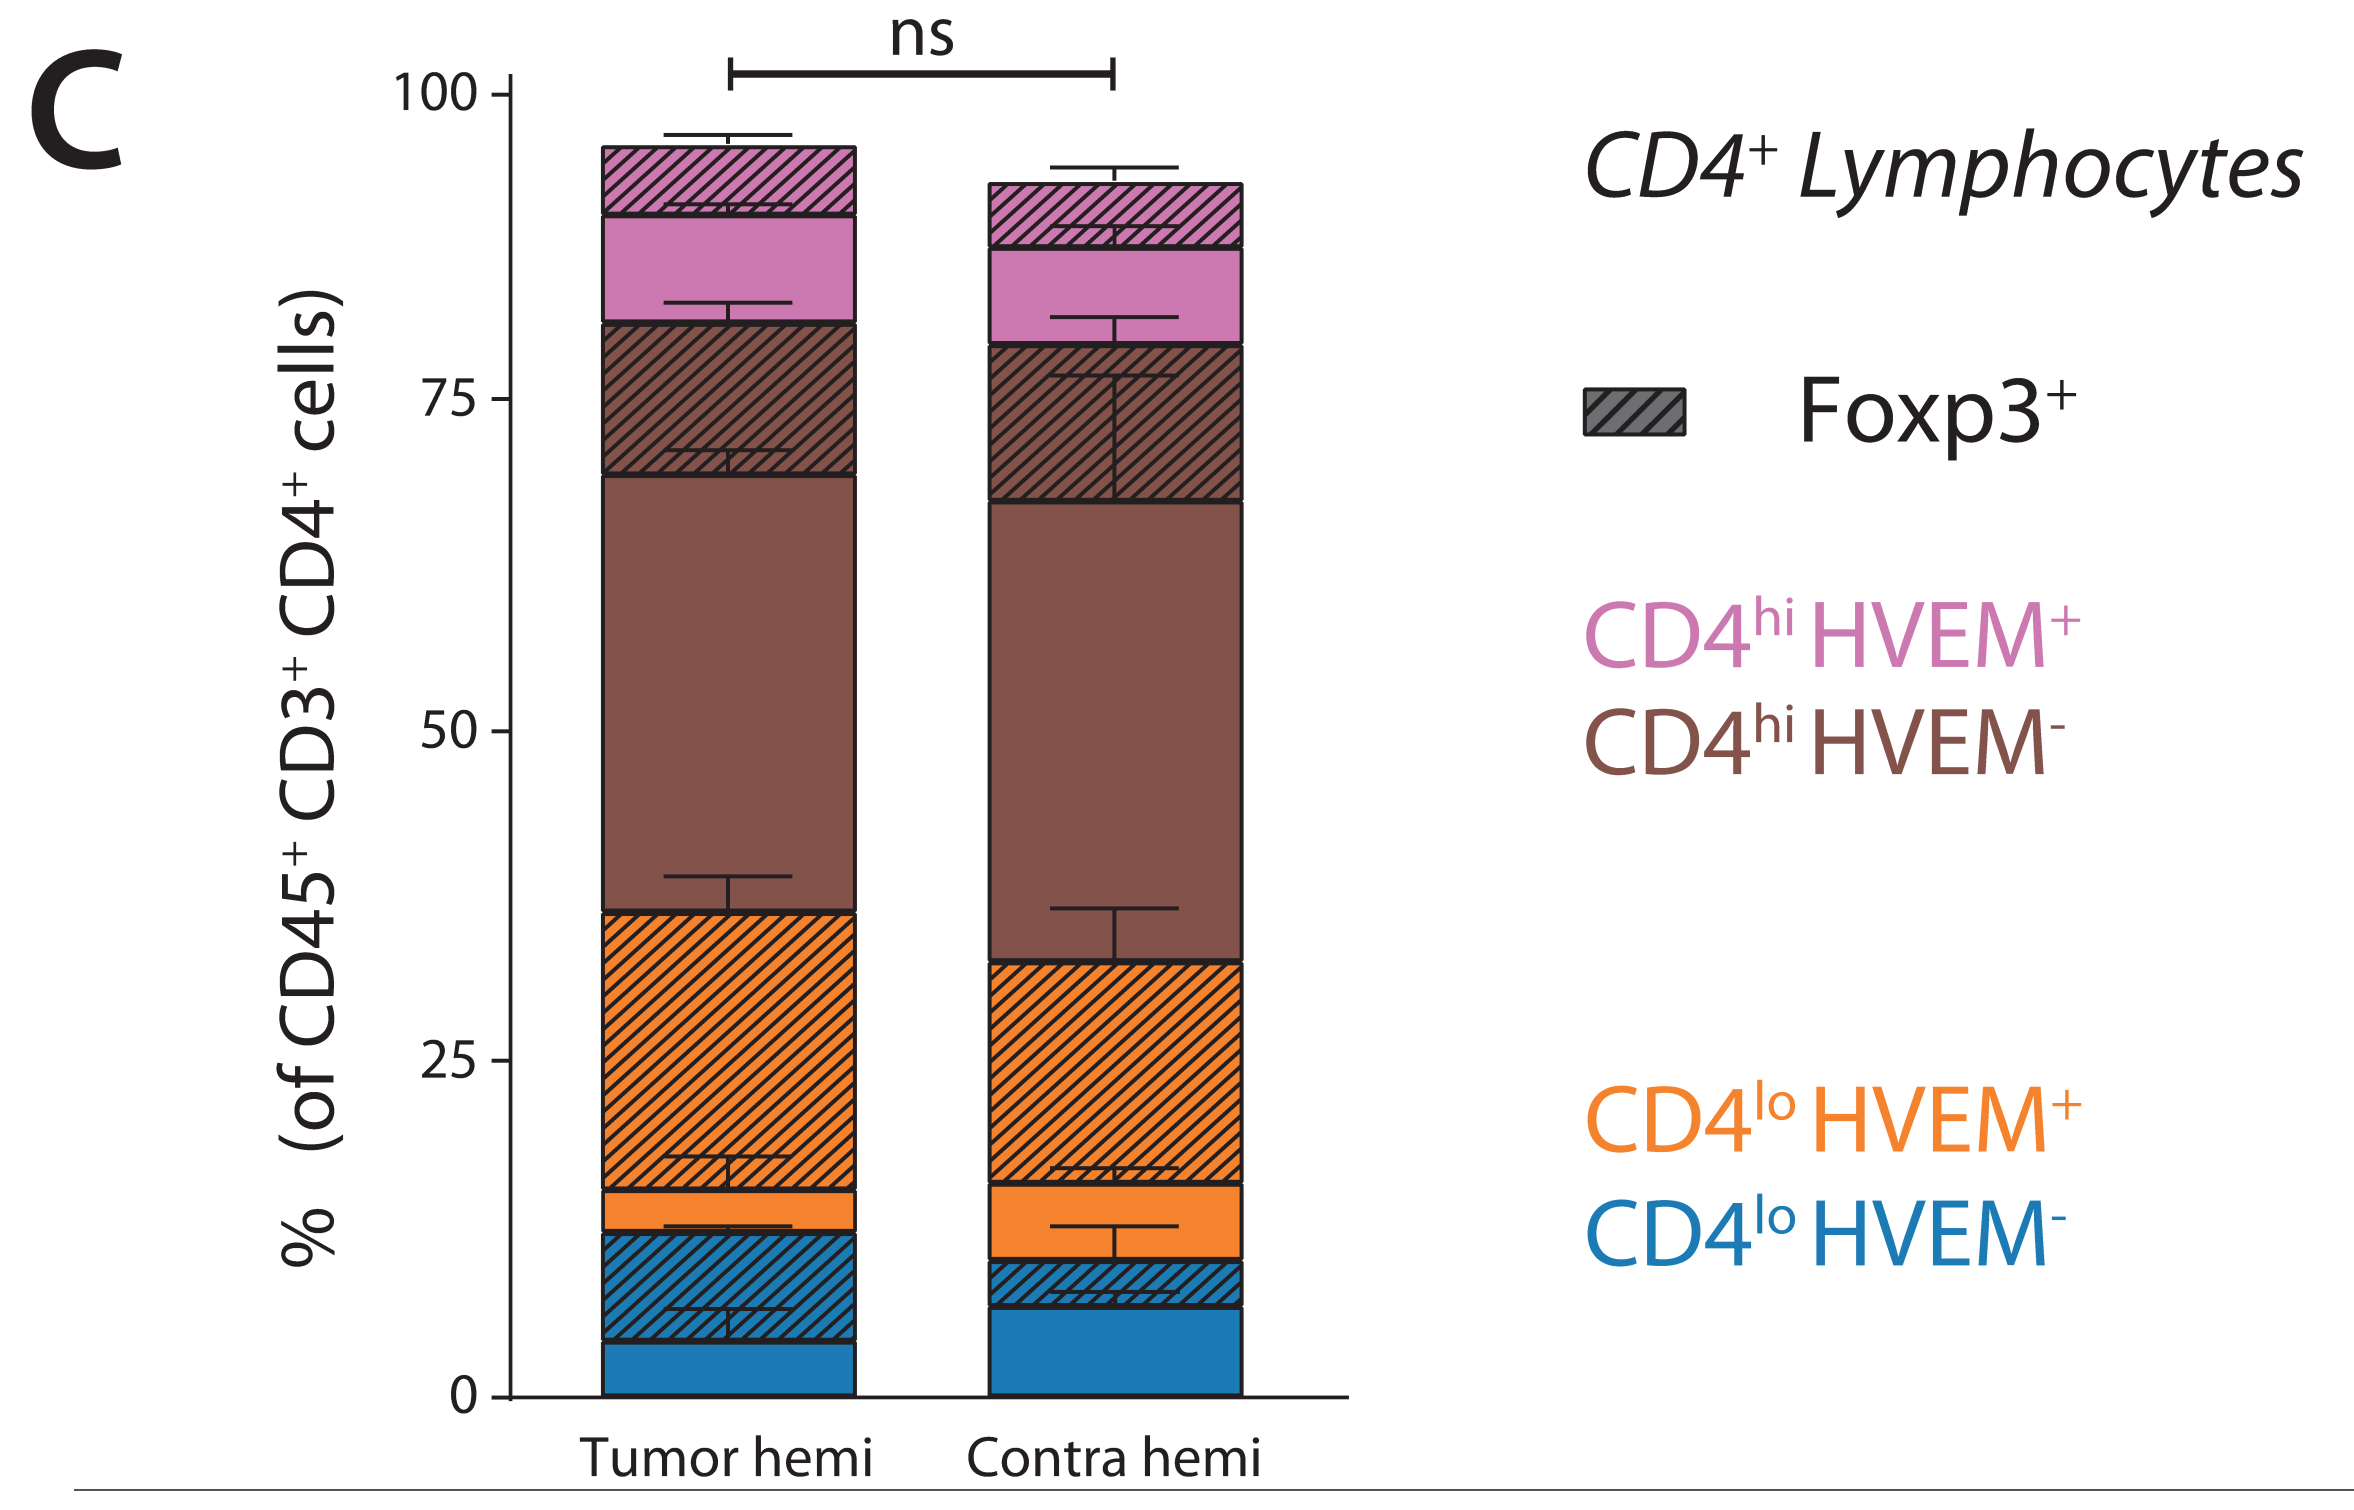

Supplement: jitc-2019-000323supp002.pdf [file jitc-2019-000323supp002.pdf]
